# Supplementary material
Source: PubMed Central journal article supplement (PMC3483893)
Supplement: peds.2012-1132_peds.2012-1132SupplementaryData.pdf [file peds.2012-1132_peds.2012-1132SupplementaryData.pdf]

# Supplemental Information

**SUPPLEMENTAL TABLE 4** Thirty-eight Published SNPs Associated With T2D at Genome-Wide Significance and Their Association With T2D in the Bogalusa Heart Study

| Nearest Gene               | Marker                    | Chr | Alleles (Risk/Other) | Published Odds Ratio Per Risk Allele | Data Included in Genotype Score | Hazard Ratio (95% CI) for T2D Per Risk Allele in the Bogalusa Heart Study <sup>b</sup> |
|----------------------------|---------------------------|-----|----------------------|--------------------------------------|---------------------------------|----------------------------------------------------------------------------------------|
| <i>KCNQ1</i>               | rs2237892 <sup>a</sup>    | 11  | C/T                  | 1.40 <sup>52</sup>                   | Genotyped                       | 0.85 (0.50, 1.45)                                                                      |
| <i>TCF7L2</i>              | rs7903146                 | 10  | T/C                  | 1.37 <sup>53</sup>                   | Genotyped                       | 1.42 (1.06–1.91)                                                                       |
| <i>CDKN2A/B</i>            | rs10811661                | 9   | T/C                  | 1.20 <sup>7,10,11</sup>              | Genotyped                       | 0.73 (0.49–1.08)                                                                       |
| <i>IRS1<sup>c</sup></i>    | rs2943641                 | 2   | C/T                  | 1.19 <sup>8</sup>                    | Genotyped                       | 1.30 (0.96–1.75)                                                                       |
| <i>IGF2BP2<sup>c</sup></i> | rs4402960                 | 3   | T/G                  | 1.17 <sup>7,10,11</sup>              | Genotyped                       | 1.37 (0.99–1.90)                                                                       |
| <i>FTO<sup>c</sup></i>     | rs8050136                 | 16  | A/C                  | 1.15 <sup>7,11</sup>                 | Genotyped                       | 1.22 (0.91–1.65)                                                                       |
| <i>KCNJ11<sup>c</sup></i>  | rs5219                    | 11  | T/C                  | 1.15 <sup>54</sup>                   | Genotyped                       | 0.84 (0.58–1.21)                                                                       |
| <i>THADA</i>               | rs7578597                 | 2   | T/C                  | 1.15 <sup>5</sup>                    | Genotyped                       | 0.77 (0.53–1.12)                                                                       |
| <i>CENTD2</i>              | rs1552224                 | 11  | A/C                  | 1.14 <sup>6</sup>                    | Genotyped                       | 0.79 (0.50–1.25)                                                                       |
| <i>PPARG</i>               | rs1801282                 | 3   | C/G                  | 1.14 <sup>55</sup>                   | Genotyped                       | 1.77 (0.89–3.49)                                                                       |
| <i>HHEX</i>                | rs1111875                 | 10  | C/T                  | 1.13 <sup>9</sup>                    | Genotyped                       | 0.81 (0.60–1.11)                                                                       |
| <i>NOTCH2</i>              | rs10923931                | 1   | T/G                  | 1.13 <sup>5</sup>                    | Genotyped                       | 1.12 (0.77–1.63)                                                                       |
| <i>WFS1<sup>c</sup></i>    | rs1801214                 | 4   | G/A                  | 1.13 <sup>6</sup>                    | Imputed                         | 0.82 (0.60–1.11)                                                                       |
| <i>ADCY5</i>               | rs11708067                | 3   | A/G                  | 1.12 <sup>56</sup>                   | Imputed                         | 1.17 (0.76–1.81)                                                                       |
| <i>CDKAL1</i>              | rs7754840                 | 6   | C/G                  | 1.12 <sup>7,10,11</sup>              | Genotyped                       | 1.48 (1.09–2.00)                                                                       |
| <i>HNF1B</i>               | rs757210 <sup>57,58</sup> | 17  | A/G                  | 1.12 <sup>59,60</sup>                | Genotyped                       | 1.13 (0.84–1.51)                                                                       |
| <i>SLC30A8</i>             | rs13266634                | 8   | C/T                  | 1.12 <sup>9</sup>                    | Genotyped                       | 1.30 (0.86–1.96)                                                                       |
| <i>CDC123/CAMK1D</i>       | rs12779790                | 10  | G/A                  | 1.11 <sup>5</sup>                    | Imputed                         | 1.04 (0.70–1.54)                                                                       |
| <i>RBMS1/ITGB6</i>         | rs7593730                 | 2   | C/T                  | 1.11 <sup>59</sup>                   | Imputed                         | 0.78 (0.57–1.07)                                                                       |
| <i>TLE4</i>                | rs13292136                | 9   | C/T                  | 1.11 <sup>6</sup>                    | Imputed                         | 0.83 (0.49–1.41)                                                                       |
| <i>HMGGA2</i>              | rs1531343                 | 12  | C/G                  | 1.10 <sup>6</sup>                    | Imputed                         | 1.16 (0.81–1.66)                                                                       |
| <i>JAZF1</i>               | rs864745                  | 7   | T/C                  | 1.10 <sup>5</sup>                    | Genotyped                       | 1.26 (0.89–1.77)                                                                       |
| <i>ADAMSTS9</i>            | rs4607103                 | 3   | C/T                  | 1.09 <sup>5</sup>                    | Genotyped                       | 1.46 (1.01–2.10)                                                                       |
| <i>MTNR1B</i>              | rs10830963                | 11  | G/C                  | 1.09 <sup>36</sup>                   | Genotyped                       | 0.97 (0.64–1.47)                                                                       |
| <i>TSPAN8/LGR5</i>         | rs7961581                 | 12  | C/T                  | 1.09 <sup>5</sup>                    | Imputed                         | 1.25 (0.90–1.73)                                                                       |
| <i>BCL11A</i>              | rs243021                  | 2   | A/G                  | 1.08 <sup>6</sup>                    | Genotyped                       | 0.89 (0.66–1.20)                                                                       |
| <i>KCNQ1</i>               | rs231362 <sup>a</sup>     | 11  | G/A                  | 1.08 <sup>6</sup>                    | Genotyped                       | 1.16 (0.84–1.60)                                                                       |
| <i>DCD</i>                 | rs1153188                 | 12  | A/T                  | 1.08 <sup>5</sup>                    | Imputed                         | 1.33 (0.91–1.95)                                                                       |
| <i>HCCA2</i>               | rs2334499                 | 11  | T/C                  | 1.08 <sup>60</sup>                   | Genotyped                       | 0.85 (0.59–1.23)                                                                       |
| <i>GCK</i>                 | rs4607517                 | 7   | A/G                  | 1.07 <sup>56</sup>                   | Genotyped                       | 0.90 (0.58–1.40)                                                                       |
| <i>KLF14</i>               | rs972283                  | 7   | G/A                  | 1.07 <sup>6</sup>                    | Imputed                         | 1.02 (0.73–1.41)                                                                       |
| <i>OASL/HNF1A</i>          | rs7957197                 | 12  | T/A                  | 1.07 <sup>6</sup>                    | Imputed                         | 0.93 (0.62–1.39)                                                                       |
| <i>PRC1</i>                | rs8042680                 | 15  | A/C                  | 1.07 <sup>6</sup>                    | Genotyped                       | 1.41 (0.98–2.04)                                                                       |
| <i>PROX1</i>               | rs340874                  | 1   | C/T                  | 1.07 <sup>56</sup>                   | Genotyped                       | 1.10 (0.79–1.53)                                                                       |
| <i>DGKB/TMEM195</i>        | rs2191349                 | 7   | T/G                  | 1.06 <sup>56</sup>                   | Imputed                         | 1.19 (0.89–1.60)                                                                       |
| <i>GCKR</i>                | rs780094                  | 2   | C/T                  | 1.06 <sup>56</sup>                   | Genotyped                       | 0.93 (0.66–1.31)                                                                       |
| <i>TP53INP1</i>            | rs896854                  | 8   | T/C                  | 1.06 <sup>6</sup>                    | Genotyped                       | 0.98 (0.73–1.32)                                                                       |
| <i>VEGFA</i>               | rs9472138                 | 6   | T/C                  | 1.06 <sup>5</sup>                    | Genotyped                       | 1.26 (0.92–1.73)                                                                       |

SNPs are ordered by published odds ratio for T2D from previous genome-wide association studies (cited). Chr, chromosome.

<sup>a</sup> These SNPs are in low linkage disequilibrium in Europeans ( $r^2 = 0.01$ ) and likely represent independent association signals at the *KCNQ1* locus.

<sup>b</sup> Hazard ratios from Cox proportional hazards models adjusted for gender, race, and baseline age.

<sup>c</sup> Genotype score in present analyses included rs7578326 (risk allele A), rs1470579 (risk allele C), rs9939609 (risk allele A), rs5215 (risk allele C), and rs10010131 (risk allele G) for the susceptibility loci near *IRS1*, *IGF2BP2*, *FTO*, *KCNJ11*, and *WFS1*, respectively.
